# Supplementary material for: Molecular characterization of breast cancer cell response to metabolic drugs
Source: PubMed Central journal article supplement (PMC5839391; doi:10.18632/oncotarget.24047), 2018-01-08
Supplement: oncotarget-09-9645-s001.pdf [file oncotarget-09-9645-s001.pdf]

## Molecular characterization of breast cancer cell response to metabolic drugs

### SUPPLEMENTARY MATERIALS

**Supplementary Table 1: SNP array.** See Supplementary\_Table\_1

**Supplementary Table 2: Protein data.** See Supplementary\_Table\_2

**Supplementary Table 3: MTF delta values.** See Supplementary\_Table\_3

**Supplementary Table 4: RP delta values.** See Supplementary\_Table\_4

**Supplementary Table 5: Prediction of MTF response using proteomics data**

| Protein | B       | Std. error | Beta   | Sig   |
|---------|---------|------------|--------|-------|
| MMGT1   | 120.295 | 0.342      | 1.070  | 0.000 |
| IDH1    | 8.233   | 0.118      | 0.208  | 0.000 |
| PSPC1   | 2.559   | 0.109      | 0.068  | 0.000 |
| TACO1   | -1.279  | 0.129      | -0.033 | 0.000 |

Linear regression model that predicts MTF response (adjusted  $R^2 = 1$ ) using protein expression data. B = constant, Std. error = standard error, Beta = covariate, Sig = statistical significance.

**Supplementary Table 6: Prediction of RP response using proteomics data**

| Protein | B       | Std. error | Beta   | Sig   |
|---------|---------|------------|--------|-------|
| ACADSB  | -14.894 | 0.154      | -0.838 | 0.000 |
| CCDC58  | 7.248   | 0.208      | 0.330  | 0.000 |
| MPZL1   | -1.837  | 0.105      | -0.094 | 0.000 |
| SBSN    | -1.945  | 0.307      | -0.079 | 0.000 |

Linear regression model that predicts RP treatment response (adjusted  $R^2 = 1$ ) using proteomics data. B = constant, Std. error = standard error, Beta = covariate, Sig = statistical significance.

**Supplementary Table 7: Prediction of RP response using functional data**

| Model        | B      | Std. error | Beta   | Sig   |
|--------------|--------|------------|--------|-------|
| Constant     | 1.095  | 0.075      |        | 0.001 |
| Metabolism A | -2.171 | 0.282      | -0.960 | 0.005 |
| Metabolism B | -1.149 | 0.356      | -0.403 | 0.048 |

Multiple linear regression model predicting response against RP treatment. B = constant, Std. error = standard error, Beta = covariate, Sig = statistical significance.

Supplementary Table 8: Cytometry experiments. See Supplementary\_Table\_8

Supplementary Table 9: FBA and FVA results. See Supplementary\_Table\_9

Supplementary Table 10: Prediction of MTF response using flux data

| Model                | B      | Std. error | Beta   | Sig   |
|----------------------|--------|------------|--------|-------|
| Constant             | 0.779  | 0.002      |        |       |
| Glutamate metabolism | -2.379 | 0.016      | -0.848 | 0.004 |
| Pyruvate metabolism  | 0.083  | 0.002      | 0.224  | 0.016 |

Linear regression model using flux activities to predict MTF response. B = constant, Std. error = standard error, Beta = covariate, Sig = statistical significance.

Supplementary Table 11: Prediction of RP response using flux data

| Model                                     | B     | Std. error | Beta  | Sig   |
|-------------------------------------------|-------|------------|-------|-------|
| Constant                                  | 0.761 | 0.001      |       | 0.000 |
| Valine, leucine and isoleucine metabolism | 2.018 | 0.002      | 0.929 | 0.001 |
| Cholesterol metabolism                    | 0.045 | 0.000      | 0.093 | 0.007 |

Linear regression model using flux activities to predict RP response. B = constant, Std. error = standard error, Beta = covariate, Sig = statistical significance.

Supplementary Table 12: Catalase and superoxide dismutase delta values between control and MTF-treated cell lines

| Cell line | Catalase | Superoxide dismutase |
|-----------|----------|----------------------|
| MCF7      | 0.36     | 0.31                 |
| T47D      | 0.18     | 1.3                  |
| CAMA1     | -0.15    | 1.25                 |
| MDAMB231  | 0.11     | 0.45                 |
| MDAMB468  | 0.20     | 0.09                 |
| HCC1143   | 0.39     | 0.90                 |

Delta was calculated, subtracting MTF catalase and superoxide dismutase cell fluxes to control cell fluxes.

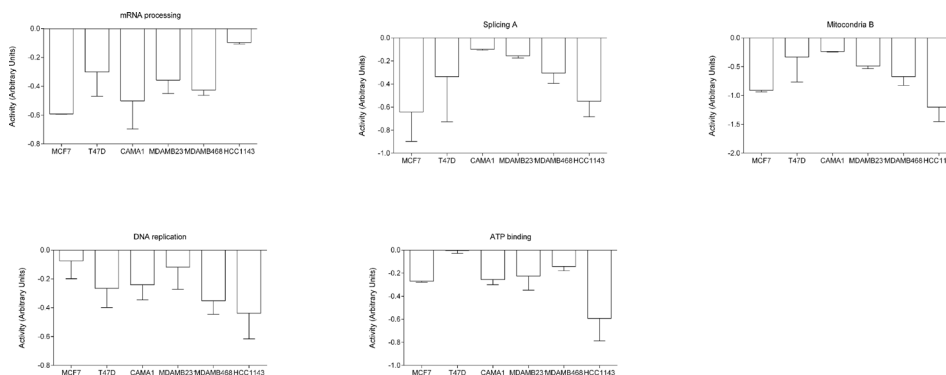

Supplementary Figure 1: Node activity measurements for cell lines treated with MTF with a decrease in functional node activity in all cell lines.

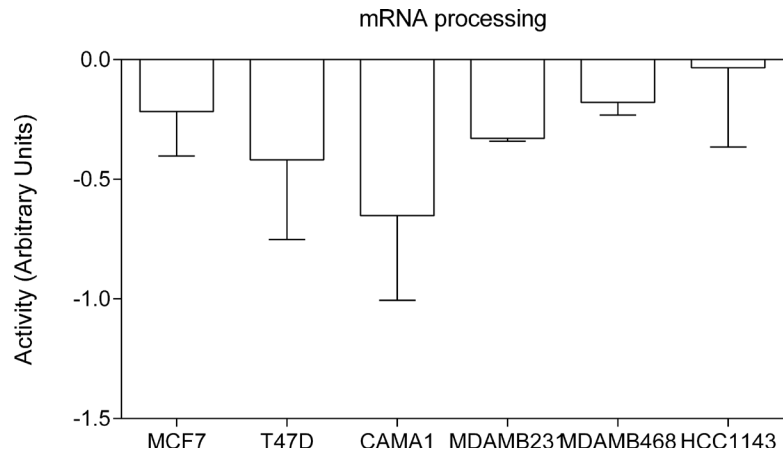

**Supplementary Figure 2: Node activity measurements for cell lines treated with RP with a decrease in functional node activity in all cell lines.**

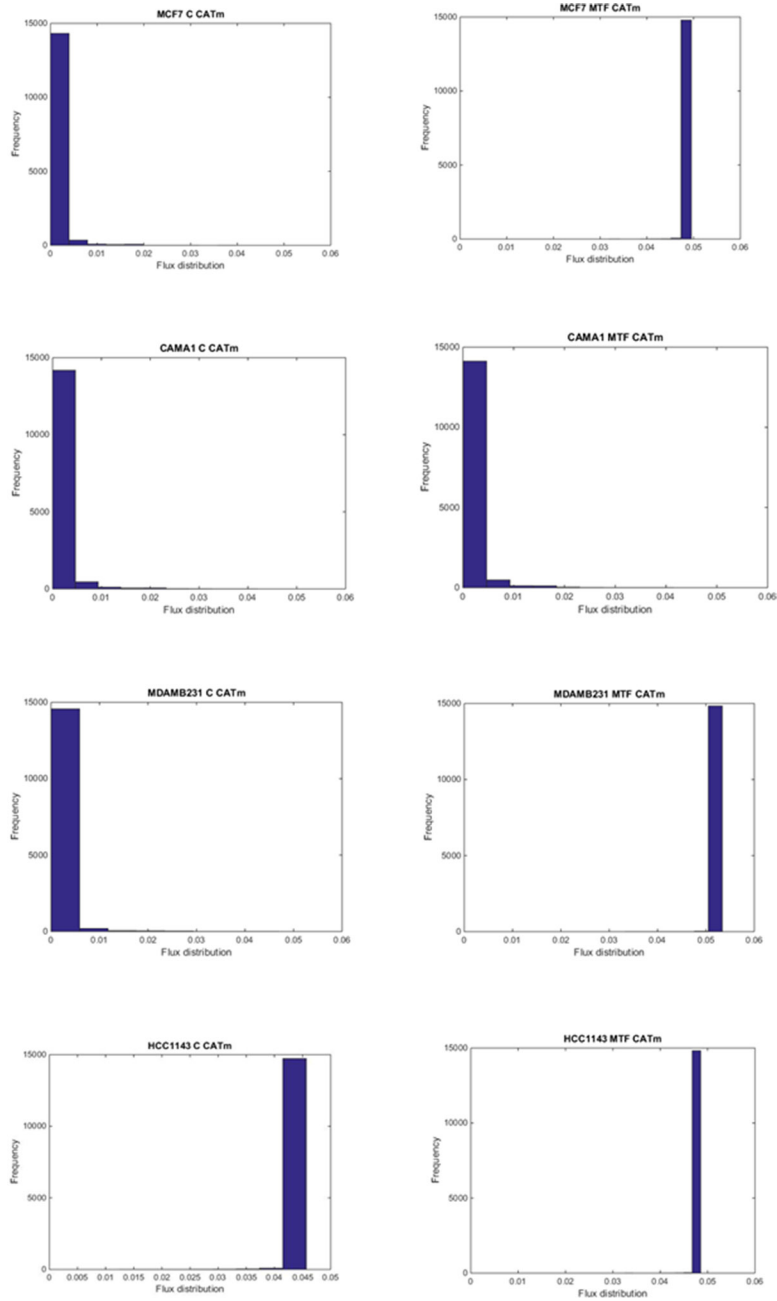

**Supplementary Figure 3: Distribution of possible fluxes of catalase (CATm) in control and MTF cell cultures.** On the y-axis, frequency is represented; understood as number of possible flux combinations provided by Monte Carlo resampling.

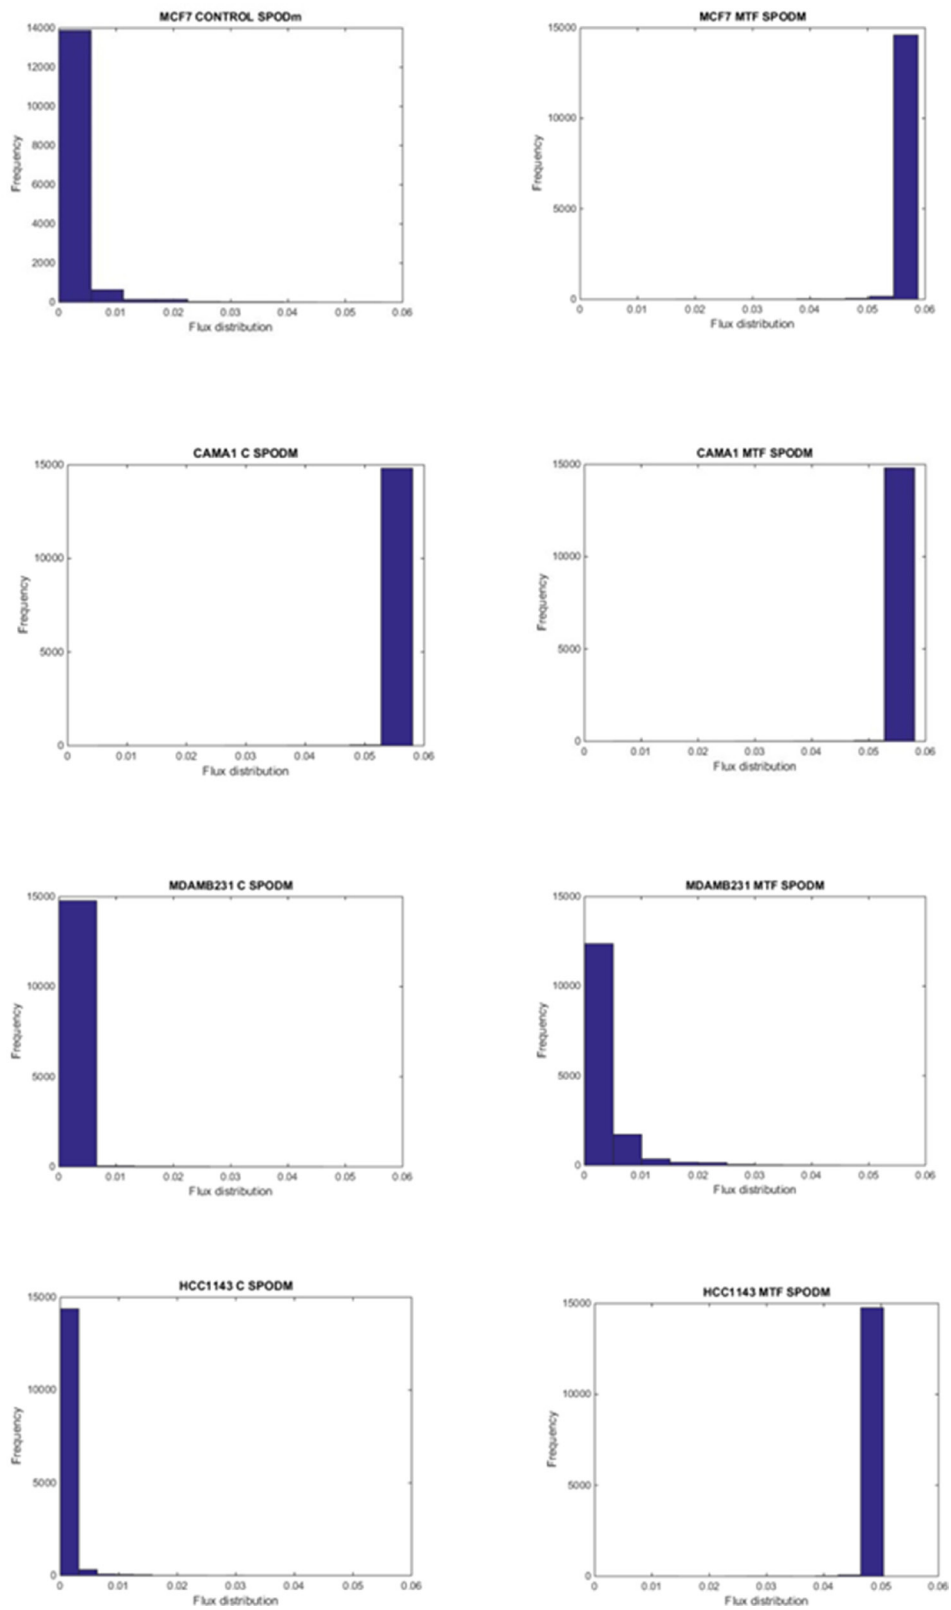

**Supplementary Figure 4: Distribution of possible fluxes of superoxide dismutase (SPODM) in control and MTF cell cultures.** On the y- axis, frequency is represented; understood as number of possible flux combinations provided by Monte Carlo resampling.

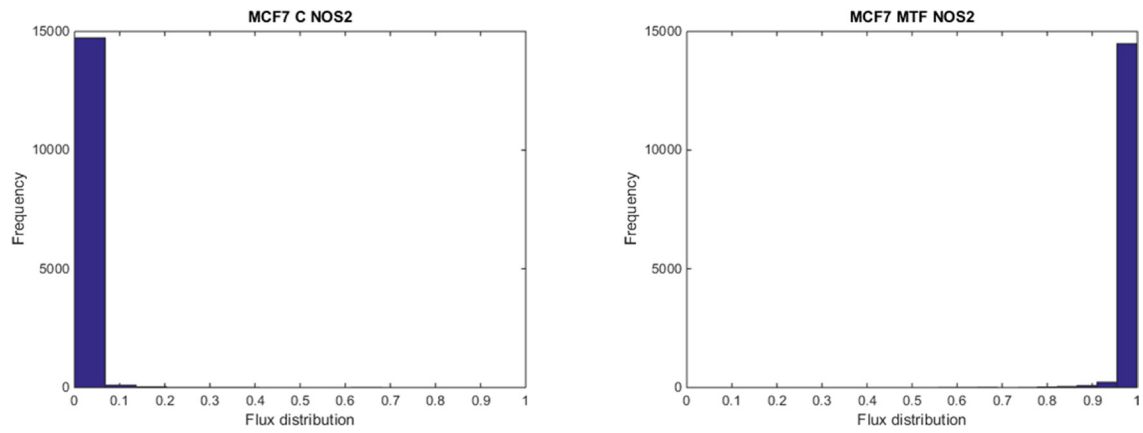

**Supplementary Figure 5: Distribution of possible fluxes of nitric oxide synthase (NOS2) in control and MTF MCF7 cell cultures.** The model predicts an increase in NO in MTF-treated MCF7 cells regarding the control. On the y-axis, frequency is represented; understood as number of possible flux combinations provided by Monte Carlo resampling.

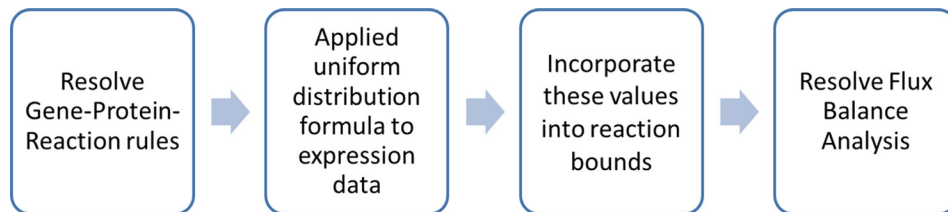

**Supplementary Figure 6: E-flux flowchart.**

**Supplementary Files 1–12: Monte Carlo sampling for each cell line and condition.** (S1 File: MCF7 Control 1, S2 File: MCF7 MTF 1, S3 File: MCF7 RP 1, S4 File: CAMA1 Control 1, S5 File: CAMA1 MTF 1, S6 File: CAMA1 RP 1, S7 File: MDAMB231 Control 1, S8 File: MDAMB231 MTF 1, S9 File: MDAMB231 RP 1, S10 File: HCC1143 Control 1, S11 File: HCC1143 MTF 1, S12 File: HCC1143 RP 1).

**Supplementary File 13: Code to incorporate normalized protein expression data into the model.** This data needs to be previously normalized using modified E-flux. See Supplementary\_File\_13
